# Supplementary material for: Estimates of the reproduction number for seasonal, pandemic, and zoonotic influenza: a systematic review of the literature
Source: Springer Nature journal article supplement (doi:10.1186/1471-2334-14-480), 2014-09-04

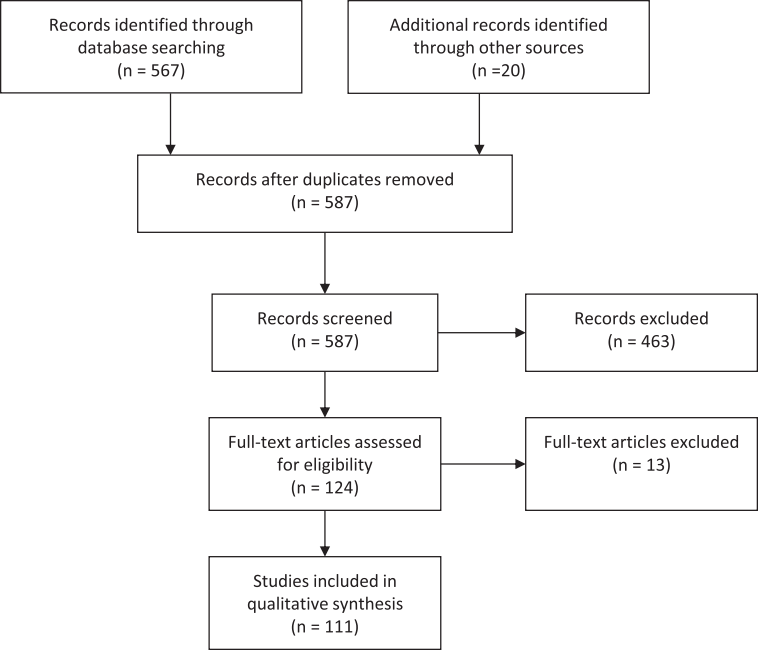

Supplement: 12879_2014_3799_MOESM7_ESM.pdf [file 12879_2014_3799_MOESM7_ESM.pdf]
