# Supplementary material for: Estimates of the reproduction number for seasonal, pandemic, and zoonotic influenza: a systematic review of the literature
Source: BMC Infect Dis. 2014 Sep 4;14:480. doi: 10.1186/1471-2334-14-480 (PMC4169819; doi:10.1186/1471-2334-14-480)
Supplement: Supplementary file 2 — Additional file 2: Reproduction Numbers from the 1957 Influenza A/H2N2 Pandemic.(CSV 2 KB) [file 12879_2014_3799_MOESM2_ESM.csv]

Location	Wavea	Study Population	Mean GT/SIb	Reproduction Number (R)	95% CIc	Basic or Effective	Case definition	Reference	Year Published
Netherlands	2nd	community	3	1.39		basic	unconfirmed deaths	(Nishiura 2010)	2010
United Kingdom	2nd	community	2.6	1.7		basic	unconfirmed deaths	(Ferguson, Cummings et al. 2006)	2006
United Kingdom	2nd	community	3	1.5–1.6		basic	unconfirmed illness	(Vynnycky and Edmunds 2008)	2008
United Kingdom	2nd	community	4	1.7–1.8		basic	unconfirmed illness	(Vynnycky and Edmunds 2008)	2008
United Kingdom	2nd	community	4.1	1.5		effective	unconfirmed illness	(Viboud, Tam et al. 2006)	2006
United Kingdom	2nd	community	NR	1.65		basic	serology confirmed infection	(Gani, Hughes et al. 2005)	2005
USA	2nd	community	4	1.7		basic	unconfirmed illness	(Longini, Halloran et al. 2004)	2004
Median reproduction number for the 1957 pandemic: 1.65; Interquartile range 1.53–1.70
a The 1957 influenza A/H2N2 pandemic began in February 1957 in southern China and spread to Singapore and Hong Kong in April (Cox and Subbarao 2000). The virus was first isolated in the United States in June 1957 and was associated with a mild first wave of illnesses (Langmuir 1961, Cox and Subbarao 2000). The peak of the pandemic occurred during the second wave in the Northern Hemisphere in Octo…
b The generation time (GT) or serial interval (SI) assumed in the reproduction number estimation
c Confidence interval
NR=Not reported
